# Supplementary material
Source: PubMed Central journal article supplement (PMC9327675)
Supplement: jvi.00505-22-s0001.pdf [file jvi.00505-22-s0001.pdf]

## Supplementary Materials for

### ***In vivo* profiling of individual multi-ciliated cells during acute influenza A virus infection**

Authors: Cait E. Hamele, Alistair B. Russell, and Nicholas S. Heaton\*

\*To whom correspondence should be addressed:  
Nicholas S. Heaton, PhD  
Email: [nicholas.heaton@duke.edu](mailto:nicholas.heaton@duke.edu)

This file includes:

Table S1. Internal deletions in influenza segments by timepoint.

**Table S1**

| cell barcode        | segment | fiveprime | threeprime | count | dpi | final length |
|---------------------|---------|-----------|------------|-------|-----|--------------|
| AACAAAGTCCTTCTTC-1  | PB1     | 262       | 2133       | 16    | one | 469          |
| ACCTGAAAGAGCCGTA-1  | PB1     | 135       | 2144       | 145   | one | 331          |
| ACTTTCACATCGTTCC-1  | PB1     | 283       | 1896       | 42    | one | 727          |
| CGTCAAATCGGTGTAT-1  | PB1     | 239       | 1978       | 15    | one | 601          |
| CTCCTTTTCATTATCC-1  | PB1     | 135       | 2144       | 144   | one | 331          |
| CTTCGGTCAATAGAGT-1  | PB1     | 143       | 2147       | 388   | one | 336          |
| GCATGATAGATCCCGC-1  | PB1     | 283       | 1896       | 31    | one | 727          |
| GGAAGTGGTGCCAGT-1   | PB1     | 213       | 2139       | 235   | one | 414          |
| GTTAGACAGTTCCATG-1  | PB1     | 262       | 2133       | 15    | one | 469          |
| TACACCCGTAGGACTG-1  | PB1     | 203       | 2087       | 58    | one | 456          |
| TCCGATCGTGTTTCGAT-1 | PB1     | 262       | 2130       | 23    | one | 472          |
| TCCGATCGTGTTTCGAT-1 | PB1     | 262       | 2133       | 49    | one | 469          |
| TCGCAGGAGCTTTCCC-1  | PB1     | 262       | 2133       | 17    | one | 469          |
| TGATCTTGTAATCAAG-1  | PB1     | 262       | 2133       | 20    | one | 469          |
| TTGTTGTTGCAATGT-1   | PB1     | 262       | 2133       | 19    | one | 469          |
| AACAAAGTCGACCACG-1  | NA      | 62        | 1271       | 172   | one | 248          |
| AACACACTCGTTATCT-1  | NA      | 97        | 1212       | 41    | one | 342          |
| AACCTGAAGGTCGTAG-1  | NA      | 205       | 1311       | 603   | one | 351          |
| AATTCCTGTACTAACC-1  | NA      | 143       | 1308       | 279   | one | 292          |
| ACTTCGCCAGAGACTG-1  | NA      | 120       | 1270       | 683   | one | 307          |
| AGAAATGCATTGGGAG-1  | NA      | 120       | 1270       | 158   | one | 307          |
| AGATAGAGTGTATACC-1  | NA      | 97        | 1212       | 29    | one | 342          |
| AGCTACAGTATACCCA-1  | NA      | 120       | 1270       | 432   | one | 307          |
| AGTTCCCAAGTTTGC-1   | NA      | 148       | 1303       | 280   | one | 302          |
| ATGAGTCTCTACGCAA-1  | NA      | 371       | 947        | 33    | one | 881          |
| ATTTCTGTCCGTCAAA-1  | NA      | 143       | 1308       | 370   | one | 292          |
| CAACAACAGCCATTTG-1  | NA      | 148       | 1303       | 347   | one | 302          |
| CTGTGAAGTGCGGATA-1  | NA      | 120       | 1270       | 183   | one | 307          |
| GATGACTGTACAAGTA-1  | NA      | 120       | 1270       | 110   | one | 307          |
| GGGCTCAAGACGATAT-1  | NA      | 143       | 1308       | 50    | one | 292          |
| GTAACACGTCCAGGTC-1  | NA      | 188       | 1250       | 1998  | one | 395          |
| GTCTACCCATGGCACC-1  | NA      | 400       | 1176       | 22    | one | 681          |
| TATCCTAAGCTCATAC-1  | NA      | 205       | 1311       | 569   | one | 351          |
| TCGCTTGAGAGCAACC-1  | NA      | 143       | 1308       | 1636  | one | 292          |
| TCGTCCATCGTTGTAG-1  | NA      | 143       | 1308       | 1032  | one | 292          |
| TCTGGCTCAAATTGCC-1  | NA      | 120       | 1270       | 591   | one | 307          |
| TGATCTTGATCCTCC-1   | NA      | 120       | 1270       | 79    | one | 307          |
| TGGATGTAGCGAATGC-1  | NA      | 143       | 1308       | 48    | one | 292          |

|                     |     |     |      |      |     |      |
|---------------------|-----|-----|------|------|-----|------|
| ATGTCCCAACAGTGG-1   | NP  | 668 | 880  | 26   | one | 1352 |
| CCGGGTATCGCAATTG-1  | NP  | 199 | 1281 | 53   | one | 482  |
| GACATCAAGCGGGTTA-1  | NP  | 266 | 1303 | 160  | one | 527  |
| GATTCTTCACCATAAC-1  | NP  | 930 | 1430 | 15   | one | 1064 |
| GCCCGAACAGCGTAGA-1  | NP  | 416 | 1081 | 105  | one | 899  |
| GGATGTTACGAGGTA-1   | NP  | 266 | 1303 | 306  | one | 527  |
| GTAGTACAGTGCACAG-1  | NP  | 663 | 1420 | 15   | one | 807  |
| GTGCTGGCAAATTGCC-1  | NP  | 99  | 1433 | 15   | one | 230  |
| TACGTCCAGGGATCGT-1  | NP  | 416 | 1081 | 71   | one | 899  |
| TGCTCGTGTATAGGGC-1  | NP  | 270 | 1277 | 512  | one | 557  |
| TTGAACGTCCAAGCTA-1  | NP  | 199 | 1281 | 522  | one | 482  |
| AGATCCACACGGTGAA-1  | HA  | 23  | 510  | 18   | one | 1289 |
| AGGTTGTAGCGCCGTT-1  | HA  | 455 | 1344 | 23   | one | 887  |
| AGTACTGGTTATTCCT-1  | HA  | 318 | 1296 | 113  | one | 798  |
| CGTGTCTCAGTTTGGT-1  | HA  | 120 | 1563 | 67   | one | 333  |
| CTAGACAAGAGGACTC-1  | HA  | 239 | 1475 | 230  | one | 540  |
| CTCCCTCGTGAATATC-1  | HA  | 106 | 1569 | 1001 | one | 313  |
| GCCCGAACAGCGTAGA-1  | HA  | 126 | 1539 | 518  | one | 363  |
| GGACGTCCAACAGAGC-1  | HA  | 83  | 1570 | 434  | one | 289  |
| GGTTGTACAGAGCTAG-1  | HA  | 345 | 1333 | 771  | one | 788  |
| GTAACACGTCCAGGTC-1  | HA  | 270 | 1509 | 1288 | one | 537  |
| GTGGAAGTCCGGCTTT-1  | HA  | 239 | 1475 | 444  | one | 540  |
| TATCCTAAGCTCATAC-1  | HA  | 455 | 1344 | 18   | one | 887  |
| TCCGTGTTCAATTGCTT-1 | HA  | 243 | 1419 | 618  | one | 600  |
| TGCTTGCAGTGTGTTT-1  | HA  | 117 | 1544 | 221  | one | 349  |
| TTACAGGCATGGCTGC-1  | HA  | 94  | 1537 | 77   | one | 333  |
| TTCCTAATCTAGCATG-1  | HA  | 79  | 1531 | 27   | one | 324  |
| TTGGGTACAACACAAA-1  | HA  | 561 | 1224 | 17   | one | 1113 |
| ACATCGATCCGTAGTA-1  | PB2 | 244 | 1995 | 27   | one | 589  |
| ACGGGTCCATCGAGCC-1  | PB2 | 216 | 2140 | 82   | one | 416  |
| ACTGTGAGTGCCTACG-1  | PB2 | 159 | 2127 | 82   | one | 372  |
| AGAACCTGTCGTGTTA-1  | PB2 | 256 | 2086 | 93   | one | 510  |
| ATCTCTATCTCTGACC-1  | PB2 | 320 | 1936 | 23   | one | 724  |
| CGCGTGACAATGTCTG-1  | PB2 | 224 | 2157 | 16   | one | 407  |
| CTTCGGTCAATAGAGT-1  | PB2 | 191 | 2159 | 282  | one | 372  |
| GAGTCATTCAAGGAGC-1  | PB2 | 152 | 2038 | 45   | one | 454  |
| GCATTAGTCGAACGGA-1  | PB2 | 152 | 2038 | 15   | one | 454  |
| GCCATTCTCCTACCAC-1  | PB2 | 307 | 1909 | 20   | one | 738  |
| GTCTCACGTATGCAAA-1  | PB2 | 318 | 1929 | 29   | one | 729  |
| TCCGGGATCCATCCGT-1  | PB2 | 320 | 1936 | 17   | one | 724  |
| TCGTCCATCGTTGTAG-1  | PB2 | 199 | 2096 | 127  | one | 443  |

|                     |     |      |      |      |     |      |
|---------------------|-----|------|------|------|-----|------|
| TGGGAAGAGGAAGTGA-1  | PB2 | 114  | 2125 | 1120 | one | 329  |
| TGGTAGTTCCCTTTGG-1  | PB2 | 152  | 2038 | 39   | one | 454  |
| TTATTGCGTGTTTCGTA-1 | PB2 | 318  | 1929 | 16   | one | 729  |
| TTCAGGAAGGTTTGAA-1  | PB2 | 210  | 2119 | 77   | one | 431  |
| ACGATCAGTGAAAGTT-1  | NS  | 352  | 1548 | 83   | one | 739  |
| AGAACCTGTCGTGTTA-1  | NS  | 1389 | 1795 | 132  | one | 1529 |
| AGGACGATCAGGAAAT-1  | NS  | 1734 | 1809 | 20   | one | 1860 |
| AGGCCACAGCGCCTAC-1  | NS  | 110  | 1707 | 684  | one | 338  |
| AGTACTGGTTATTCCT-1  | NS  | 474  | 1571 | 42   | one | 838  |
| ATTTCTGTCCGTCAAA-1  | NS  | 169  | 1713 | 27   | one | 391  |
| CACGTTCCAGTGCCTG-1  | NS  | 283  | 1313 | 20   | one | 905  |
| CATACAGAGGATTTCC-1  | NS  | 280  | 1832 | 86   | one | 383  |
| CCGGTGAGTAGTCACT-1  | NS  | 210  | 1726 | 64   | one | 419  |
| CGTCCATAGCGTACAG-1  | NS  | 478  | 1800 | 1290 | one | 613  |
| CGTGATACAAGTTCCA-1  | NS  | 523  | 1417 | 33   | one | 1041 |
| CGTGTCTCAGTTTGGT-1  | NS  | 478  | 1800 | 518  | one | 613  |
| CTTCGGTCAATAGAGT-1  | NS  | 236  | 1661 | 106  | one | 510  |
| GAGGGTAAGACCGTTT-1  | NS  | 523  | 1417 | 15   | one | 1041 |
| GCCCGAACAGCGTAGA-1  | NS  | 478  | 1800 | 133  | one | 613  |
| GTAATGCTCCCATACC-1  | NS  | 185  | 1804 | 85   | one | 316  |
| GTGTGGCGTCCACATA-1  | NS  | 444  | 1419 | 101  | one | 960  |
| GTTCTATCAGGAGACT-1  | NS  | 280  | 1832 | 75   | one | 383  |
| TACACCCGTAGGACTG-1  | NS  | 216  | 1662 | 20   | one | 489  |
| TACTGCCGTTGGCCGT-1  | NS  | 523  | 1417 | 26   | one | 1041 |
| TCGTCCATCGTTGTAG-1  | NS  | 169  | 1713 | 1973 | one | 391  |
| TGATCTTTCACGGTCG-1  | NS  | 523  | 1417 | 16   | one | 1041 |
| TTCTTCCAGGCATTTTC-1 | NS  | 899  | 1628 | 211  | one | 1206 |
| TTGAACGTCCAAGCTA-1  | NS  | 701  | 1838 | 4674 | one | 798  |
| TTGCATTCAGTCACGC-1  | NS  | 701  | 1838 | 5440 | one | 798  |
| AGTACTGGTTATTCCT-1  | PA  | 528  | 1692 | 18   | one | 1068 |
| CCCTCTCAGGGACCAT-1  | PA  | 174  | 1952 | 19   | one | 454  |
| GTTTGGGAAGCTAGAAT-1 | PA  | 410  | 1724 | 17   | one | 918  |
| TAGGTTGCAACGACAG-1  | M   | 822  | 919  | 15   | one | 929  |
| TCCGTGTTCAATTGCTT-1 | M   | 321  | 763  | 95   | one | 584  |
| TTCTTCCCATGAAGCG-1  | M   | 662  | 837  | 17   | one | 851  |
| AAGGAATAGTCTTGGT-1  | PB1 | 262  | 2130 | 15   | two | 472  |
| AAGGAATAGTCTTGGT-1  | PB1 | 262  | 2133 | 16   | two | 469  |
| AATTTCCCACCCTCTA-1  | PB1 | 262  | 2130 | 27   | two | 472  |
| AATTTCCCACCCTCTA-1  | PB1 | 262  | 2133 | 61   | two | 469  |
| ACCTACCAGCCTCAAT-1  | PB1 | 262  | 2133 | 42   | two | 469  |
| AGCATCAGTCACTTCC-1  | PB1 | 262  | 2133 | 36   | two | 469  |

|                     |     |      |      |      |     |      |
|---------------------|-----|------|------|------|-----|------|
| AGGAATATCTGCATGA-1  | PB1 | 137  | 2045 | 260  | two | 432  |
| ATCACTTTTCGATGGAG-1 | PB1 | 262  | 2133 | 49   | two | 469  |
| ATGGGAGTCCTGTAAG-1  | PB1 | 197  | 2110 | 522  | two | 427  |
| CCAATGATCACGTAGT-1  | PB1 | 233  | 2183 | 2160 | two | 390  |
| CGCATGGGTTATAGAG-1  | PB1 | 262  | 2133 | 22   | two | 469  |
| CTCACTGGTCCTACAA-1  | PB1 | 1573 | 2173 | 15   | two | 1740 |
| CTGAATGCAGTCCCGA-1  | PB1 | 262  | 2133 | 26   | two | 469  |
| CTGTAGATCCGCACGA-1  | PB1 | 262  | 2130 | 37   | two | 472  |
| CTGTAGATCCGCACGA-1  | PB1 | 262  | 2133 | 70   | two | 469  |
| CTGTAGATCCGCACGA-1  | PB1 | 266  | 2130 | 17   | two | 476  |
| CTTACCGGTTTGTCT-1   | PB1 | 262  | 2133 | 22   | two | 469  |
| GACCTTCTCGGTCTAA-1  | PB1 | 262  | 2133 | 30   | two | 469  |
| GCTGCAGGTACCATAC-1  | PB1 | 169  | 2152 | 991  | two | 357  |
| GGAGATGGTTCTCACC-1  | PB1 | 262  | 2130 | 37   | two | 472  |
| GGAGATGGTTCTCACC-1  | PB1 | 262  | 2133 | 93   | two | 469  |
| GTAACCACACGCTGCA-1  | PB1 | 312  | 2068 | 69   | two | 584  |
| GTTGTCCCAAGTCCCG-1  | PB1 | 262  | 2130 | 39   | two | 472  |
| GTTGTCCCAAGTCCCG-1  | PB1 | 262  | 2133 | 116  | two | 469  |
| GTTGTCCCAAGTCCCG-1  | PB1 | 266  | 2130 | 39   | two | 476  |
| GTTGTCCCAAGTCCCG-1  | PB1 | 266  | 2133 | 31   | two | 473  |
| TCACAAGAGGTTCGAGT-1 | PB1 | 262  | 2133 | 18   | two | 469  |
| TTCTAACAGCCTCAAT-1  | PB1 | 262  | 2130 | 62   | two | 472  |
| TTCTAACAGCCTCAAT-1  | PB1 | 262  | 2133 | 204  | two | 469  |
| TTCTAACAGCCTCAAT-1  | PB1 | 266  | 2130 | 52   | two | 476  |
| TTCTAACAGCCTCAAT-1  | PB1 | 266  | 2133 | 44   | two | 473  |
| AGACAGGTCTCTGACC-1  | NA  | 243  | 1188 | 89   | two | 512  |
| AGATAGACATGGCCAC-1  | NA  | 78   | 1341 | 7573 | two | 194  |
| CCACGTTAGCAATAAC-1  | NA  | 120  | 1270 | 4700 | two | 307  |
| CTATAGGAGAAGTCAT-1  | NA  | 128  | 1188 | 563  | two | 397  |
| GGTGTTCGGTTTAGAGA-1 | NA  | 303  | 1213 | 598  | two | 547  |
| TCATGCCGTATGTGTC-1  | NA  | 110  | 1164 | 17   | two | 403  |
| TCATGCCGTTAGGGAC-1  | NA  | 303  | 1213 | 1173 | two | 547  |
| TCCAGAACACGGGCTT-1  | NA  | 110  | 1164 | 23   | two | 403  |
| TCGTGCTGTACGATGG-1  | NA  | 600  | 1253 | 32   | two | 804  |
| TCTACCGTCGAGTTGT-1  | NA  | 78   | 1341 | 4588 | two | 194  |
| TGTGTGACACATACTG-1  | NA  | 303  | 1213 | 1191 | two | 547  |
| TTACAGGCATAATCGC-1  | NA  | 303  | 1213 | 896  | two | 547  |
| TTACGTTAGCTTTGTG-1  | NA  | 74   | 1333 | 2138 | two | 198  |
| GTTATGGCAGTGTGGA-1  | NP  | 441  | 1043 | 22   | two | 962  |
| TACCTGCCAGGACTTT-1  | NP  | 631  | 778  | 15   | two | 1417 |
| AAAGTGAGTAGTCTTG-1  | HA  | 396  | 1149 | 2142 | two | 1023 |

|                    |     |      |      |      |     |      |
|--------------------|-----|------|------|------|-----|------|
| AGCGATTTCAAGCCAT-1 | HA  | 306  | 1447 | 1250 | two | 635  |
| AGGGTTTAGGAAGAAC-1 | HA  | 94   | 1537 | 2128 | two | 333  |
| CCAATTTTCGAAGTGG-1 | HA  | 1006 | 1595 | 15   | two | 1187 |
| CTCAGTCCAGCGGATA-1 | HA  | 232  | 1489 | 425  | two | 519  |
| GACCTTCGTCGTA-1    | HA  | 164  | 1501 | 440  | two | 439  |
| GGTGATTAGCCGTCGT-1 | HA  | 284  | 1442 | 597  | two | 618  |
| TCATCCGGTAGGTACG-1 | HA  | 191  | 1591 | 884  | two | 376  |
| TCTTAGTCATTCTTCA-1 | HA  | 787  | 1129 | 169  | two | 1434 |
| TGCAGGCGTTGGCCTG-1 | HA  | 434  | 1343 | 734  | two | 867  |
| TGCTTGCAGCTTCTAG-1 | HA  | 1371 | 1589 | 976  | two | 1558 |
| TGCTTGCAGCTTCTAG-1 | HA  | 321  | 1537 | 102  | two | 560  |
| TGGGCTGCACCTTCCA-1 | HA  | 254  | 1396 | 17   | two | 634  |
| TGGGCTGGTCTTACAG-1 | HA  | 205  | 1507 | 151  | two | 474  |
| TTGGGATAGGAGACCT-1 | HA  | 1371 | 1589 | 907  | two | 1558 |
| TTGGGATAGGAGACCT-1 | HA  | 321  | 1537 | 76   | two | 560  |
| AATCACGTCCGCAGTG-1 | PB2 | 160  | 2069 | 24   | two | 431  |
| AGAGAATCATAGTCGT-1 | PB2 | 210  | 2119 | 119  | two | 431  |
| AGATCGTGTCTGGGT-1  | PB2 | 105  | 2113 | 179  | two | 332  |
| AGCGATTCACTAGTAC-1 | PB2 | 196  | 2104 | 19   | two | 432  |
| AGGAATAGTTAAGTCC-1 | PB2 | 196  | 2104 | 240  | two | 432  |
| AGGAATATCTGCATGA-1 | PB2 | 152  | 2038 | 44   | two | 454  |
| ATGGGAGCAGAACTAA-1 | PB2 | 199  | 2096 | 191  | two | 443  |
| ATGGGAGCAGAACTAA-1 | PB2 | 244  | 2099 | 258  | two | 485  |
| CTATAGGCACGTTGGC-1 | PB2 | 199  | 2096 | 65   | two | 443  |
| CTCAGTCGTCATCGGC-1 | PB2 | 199  | 2096 | 56   | two | 443  |
| GATGATCAGGAGATAG-1 | PB2 | 216  | 2140 | 1160 | two | 416  |
| GCATCGGGTCCGCAGT-1 | PB2 | 152  | 2038 | 50   | two | 454  |
| GCGATCGCAGGAAGTC-1 | PB2 | 400  | 2166 | 214  | two | 574  |
| GGGATCCGTAACAGGC-1 | PB2 | 207  | 2104 | 660  | two | 443  |
| GTAATCGGTACGGATG-1 | PB2 | 282  | 2247 | 50   | two | 375  |
| TACAGGTTCCGTATGA-1 | PB2 | 199  | 2096 | 24   | two | 443  |
| TGAGGAGCATCCAACA-1 | PB2 | 196  | 2104 | 1482 | two | 432  |
| TTACCATCACTCACTC-1 | PB2 | 199  | 2096 | 148  | two | 443  |
| AAAGTGAGTAGTCTTG-1 | NS  | 184  | 1735 | 840  | two | 384  |
| AATGGCTGTGGTAATA-1 | NS  | 168  | 1801 | 3627 | two | 302  |
| AGCCAATTCTCCCATG-1 | NS  | 330  | 1750 | 23   | two | 515  |
| AGCGATTTCAAGCCAT-1 | NS  | 99   | 1628 | 269  | two | 406  |
| CACGGGTCAACTGATC-1 | NS  | 103  | 244  | 17   | two | 1794 |
| CACGGGTCAACTGATC-1 | NS  | 640  | 1791 | 822  | two | 784  |
| CAGCAGCGTCTGTAGT-1 | NS  | 64   | 1752 | 2537 | two | 247  |
| CATCGGGGTGCGGTAA-1 | NS  | 305  | 1797 | 5058 | two | 443  |

|                     |     |     |      |      |       |      |
|---------------------|-----|-----|------|------|-------|------|
| CCTCACACATGAAGCG-1  | NS  | 217 | 1814 | 20   | two   | 338  |
| CGGCAGTGTCTAACTG-1  | NS  | 478 | 1800 | 20   | two   | 613  |
| CGGGTCAGTATTGAGA-1  | NS  | 371 | 1451 | 30   | two   | 855  |
| CTCCTCCAGACCGCCT-1  | NS  | 189 | 1794 | 1501 | two   | 330  |
| CTGCCTATCTGGCCGA-1  | NS  | 721 | 1517 | 41   | two   | 1139 |
| GAGTGAGAGGAACGAA-1  | NS  | 264 | 1754 | 1562 | two   | 445  |
| GATTCTTTCCGATAGT-1  | NS  | 281 | 1601 | 343  | two   | 615  |
| GCACTAACATTCTTCA-1  | NS  | 378 | 1536 | 141  | two   | 777  |
| GGAGGATCAGCTGTTA-1  | NS  | 280 | 1459 | 20   | two   | 756  |
| GTCGTAATCACATTGG-1  | NS  | 217 | 1814 | 230  | two   | 338  |
| GTGTTAGGTCCGGTGT-1  | NS  | 721 | 1517 | 24   | two   | 1139 |
| TACAGGTTCCGTATGA-1  | NS  | 478 | 1800 | 377  | two   | 613  |
| TCTTAGTCATTCTTCA-1  | NS  | 105 | 1628 | 529  | two   | 412  |
| TGTCCCACAAACAGGC-1  | NS  | 203 | 1675 | 1575 | two   | 463  |
| TGTCCTGCATTGAAGA-1  | NS  | 595 | 1726 | 1320 | two   | 804  |
| TTACCATCACTCACTC-1  | NS  | 97  | 1728 | 94   | two   | 304  |
| TTAGGCACACAGCCTG-1  | NS  | 261 | 1695 | 1101 | two   | 501  |
| ACTGTCCGTTACACTG-1  | PA  | 134 | 1980 | 31   | two   | 386  |
| ATGGGAGCAGAATAA-1   | PA  | 241 | 1940 | 31   | two   | 533  |
| GGATGTTTCCATTTCA-1  | PA  | 129 | 2000 | 252  | two   | 361  |
| GGTCACGAGCTAATGA-1  | PA  | 517 | 1709 | 33   | two   | 1040 |
| TATGTTTCAGAGATGCC-1 | PA  | 593 | 1491 | 25   | two   | 1334 |
| TTTATGCAGACGTCTGA-1 | M   | 264 | 351  | 23   | two   | 939  |
| ATACTTCTCCGTAGTA-1  | PB1 | 317 | 2148 | 1494 | three | 509  |
| CATACCCAGCGAGTA-1   | PB1 | 262 | 2133 | 18   | three | 469  |
| CATCGGGGTAATTAGG-1  | PB1 | 145 | 2183 | 21   | three | 302  |
| CGCCAGACACGGATCC-1  | PB1 | 262 | 2130 | 31   | three | 472  |
| CGCCAGACACGGATCC-1  | PB1 | 262 | 2133 | 49   | three | 469  |
| CGCCAGACACGGATCC-1  | PB1 | 266 | 2133 | 35   | three | 473  |
| GTAGAAAGTCAACGCC-1  | PB1 | 136 | 2047 | 181  | three | 429  |
| GTCTCACCACCAACAT-1  | PB1 | 262 | 2130 | 27   | three | 472  |
| GTCTCACCACCAACAT-1  | PB1 | 262 | 2133 | 103  | three | 469  |
| GTCTCACCACCAACAT-1  | PB1 | 266 | 2130 | 17   | three | 476  |
| GTCTCACCACCAACAT-1  | PB1 | 266 | 2133 | 33   | three | 473  |
| TAGACTGGTGTGTCCG-1  | PB1 | 262 | 2133 | 46   | three | 469  |
| TCCACGTCACCCAATA-1  | PB1 | 97  | 2239 | 2038 | three | 198  |
| AACAAAGCACTGTGAT-1  | NA  | 59  | 1341 | 306  | three | 175  |
| ACCAAAGTCGCTGCA-1   | NA  | 87  | 1349 | 89   | three | 195  |
| AGGTTACCATAGCACT-1  | NA  | 309 | 1079 | 17   | three | 687  |
| AGGTTACCATAGCACT-1  | NA  | 54  | 1252 | 916  | three | 259  |
| CGCATAACAGACCTAT-1  | NA  | 153 | 1287 | 6363 | three | 323  |

|                     |     |      |      |       |       |      |
|---------------------|-----|------|------|-------|-------|------|
| GAGACTTGTACCGTCG-1  | NA  | 153  | 1287 | 885   | three | 323  |
| GGGAGATGTGGCAACA-1  | NA  | 59   | 1341 | 325   | three | 175  |
| GGTGAAGAGCTTCTAG-1  | NA  | 202  | 1188 | 167   | three | 471  |
| GTATTCGTCTGTAAC-1   | NA  | 120  | 1270 | 2359  | three | 307  |
| GTGCACGTCGTGGCGT-1  | NA  | 203  | 1210 | 174   | three | 450  |
| TAGGTTGGTGTGAATA-1  | NA  | 101  | 1327 | 1203  | three | 231  |
| TAGGTTGGTGTGAATA-1  | NA  | 701  | 1327 | 17    | three | 831  |
| TCCTCTGTAGTGATA-1   | NA  | 120  | 1270 | 3165  | three | 307  |
| TGTTGAGCAGTTTCGA-1  | NA  | 288  | 1153 | 378   | three | 592  |
| CATTGTTGTGGAACAC-1  | NP  | 124  | 1525 | 90    | three | 163  |
| CGTCAAACAGTGTGGA-1  | NP  | 24   | 114  | 15    | three | 1474 |
| GCAGTTAGTCTGCAAT-1  | NP  | 416  | 1093 | 104   | three | 887  |
| GCCAGCACAGGCCTGT-1  | NP  | 216  | 1524 | 15    | three | 256  |
| TTACCATAGCAAATCA-1  | NP  | 305  | 1529 | 123   | three | 340  |
| AATGCCAGTAGACTGG-1  | HA  | 650  | 1148 | 208   | three | 1278 |
| ACCTGAAAGTCAGAGC-1  | HA  | 754  | 1342 | 15    | three | 1188 |
| AGTCACAGTGGCCACT-1  | HA  | 117  | 1544 | 1834  | three | 349  |
| AGTTAGCTCCCTCTTT-1  | HA  | 216  | 1415 | 222   | three | 577  |
| CCCTCAACATGTGACT-1  | HA  | 117  | 1544 | 4128  | three | 349  |
| CGAATTGTCTCTGCCA-1  | HA  | 196  | 1570 | 28    | three | 402  |
| CGAGGCTTCGCAAGAG-1  | HA  | 196  | 1570 | 36002 | three | 402  |
| GACCCTTCATCGGTTA-1  | HA  | 117  | 1544 | 179   | three | 349  |
| GACCCTTGTTATGACC-1  | HA  | 1281 | 1618 | 19    | three | 1439 |
| GTAATCGGTTTGCAGT-1  | HA  | 196  | 1570 | 1362  | three | 402  |
| GTTCCGTAGCACACCC-1  | HA  | 117  | 1544 | 255   | three | 349  |
| TATTCCACATAACGGG-1  | HA  | 117  | 1544 | 2971  | three | 349  |
| TCACGCTGTATGAGAT-1  | HA  | 117  | 1544 | 3572  | three | 349  |
| TCCCAGTCATCTAGAC-1  | HA  | 117  | 1544 | 3764  | three | 349  |
| TGCAGTAGTACTGCGC-1  | HA  | 31   | 1643 | 47    | three | 164  |
| TTGGTTTCAATCGCGC-1  | HA  | 92   | 1589 | 19    | three | 279  |
| TTGGTTTCAATCGCGC-1  | HA  | 96   | 1593 | 15782 | three | 279  |
| TTGGTTTCACTCTAGA-1  | HA  | 233  | 1411 | 86    | three | 598  |
| AACCCAACATTCCTAT-1  | PB2 | 189  | 2054 | 77    | three | 475  |
| AGTACTGTCCGGTAGGA-1 | PB2 | 215  | 2085 | 1112  | three | 470  |
| AGTTAGCTCCCTCTTT-1  | PB2 | 233  | 2127 | 1772  | three | 446  |
| CAGGGCTAGTTCATCG-1  | PB2 | 252  | 2164 | 2780  | three | 428  |
| CATACTTAGTCGCTAT-1  | PB2 | 152  | 2038 | 75    | three | 454  |
| CTATCTAGTACCGTCG-1  | PB2 | 215  | 2085 | 140   | three | 470  |
| GAGTCTAGTTCTTCAT-1  | PB2 | 233  | 2127 | 6207  | three | 446  |
| GGCAGTCCATCGTTCC-1  | PB2 | 276  | 2151 | 1603  | three | 465  |
| GTGCTTCGTTTCGATG-1  | PB2 | 313  | 2148 | 24    | three | 505  |



|                    |     |     |      |      |       |      |
|--------------------|-----|-----|------|------|-------|------|
| TATTCCACATAACGGG-1 | PB2 | 313 | 2148 | 674  | three | 505  |
| TCACAAGGTGGGCTCT-1 | PB2 | 294 | 2142 | 1790 | three | 492  |
| TCGCTCACACGGTGCT-1 | PB2 | 215 | 2085 | 51   | three | 470  |
| TTGACCCTCTTTGATC-1 | PB2 | 233 | 2127 | 15   | three | 446  |
| TTTATGCAGACAACTA-1 | PB2 | 252 | 2164 | 2426 | three | 428  |
| AGACCCGCAAGAGTAT-1 | NS  | 257 | 1626 | 30   | three | 566  |
| AGGTTGTCAATTGCAC-1 | NS  | 391 | 1798 | 19   | three | 528  |
| CAAGACTTCCGAGCTG-1 | NS  | 721 | 1517 | 35   | three | 1139 |
| CACTAAGGTCCGAAAC-1 | NS  | 280 | 1900 | 22   | three | 315  |
| CATGCCTTCAGAGCAG-1 | NS  | 306 | 1482 | 30   | three | 759  |
| CGGACACTCAGACCGC-1 | NS  | 250 | 1569 | 677  | three | 616  |
| GACCTTCGTATTAAGG-1 | NS  | 156 | 1783 | 418  | three | 308  |
| GAGTCTAGTTCTTCAT-1 | NS  | 152 | 1669 | 2101 | three | 418  |
| GCGTGCAAGGCTTTCA-1 | NS  | 125 | 1852 | 3776 | three | 208  |
| GTAGAAAGTCAACGCC-1 | NS  | 238 | 1716 | 241  | three | 457  |
| GTGGGAAGTATTGACC-1 | NS  | 346 | 1798 | 39   | three | 483  |
| GTTAGACGTTACCCTC-1 | NS  | 335 | 1627 | 1013 | three | 643  |
| TAACACGAGTCTTCGA-1 | NS  | 227 | 1740 | 16   | three | 422  |
| TAGGTTGGTGTGAATA-1 | NS  | 250 | 1569 | 22   | three | 616  |
| TATTCCACATAACGGG-1 | NS  | 152 | 1669 | 79   | three | 418  |
| TCAAGTGTCCCATAAG-1 | NS  | 250 | 1569 | 33   | three | 616  |
| TTGACCCTCTTTGATC-1 | NS  | 152 | 1669 | 34   | three | 418  |
| GAGTCTAGTTCTTCAT-1 | PA  | 223 | 1995 | 833  | three | 460  |
| GGTGAAGAGCTTCTAG-1 | PA  | 207 | 1978 | 75   | three | 461  |
| TATTCCACATAACGGG-1 | PA  | 223 | 1995 | 17   | three | 460  |
| ATGTTGGTATAGGAT-1  | M   | 394 | 598  | 16   | three | 822  |
| CCCACTCAAGACTGG-1  | M   | 414 | 903  | 16   | three | 537  |
| GGCTTTCGTTCAAACC-1 | M   | 157 | 846  | 23   | three | 337  |
